# Supplementary material
Source: PubMed Central journal article supplement (PMC10394195)
Supplement: jmcp.2022.21270_s001.pdf [file jmcp.2022.21270_s001.pdf]

## **SUPPLEMENTARY MATERIALS**

### **Cost-sharing and adherence, clinical outcomes, health care utilization, and costs: A systematic literature review**

Nicole Fusco, ScD; Brian Sils, MMP; Jennifer S Graff, PharmD; Kristin Kistler, PhD; Kimberly Ruiz, EdM

**SUPPLEMENTARY FIGURE 1** Relative Change in Adherence by Change in Cost-Sharing by Disease

**SUPPLEMENTARY FIGURE 2** Prescription Discontinuation by Cost-Sharing

**SUPPLEMENTARY TABLE 1** Search Strategy

**SUPPLEMENTARY TABLE 2** Study Result Categorization

**SUPPLEMENTARY TABLE 3** Characteristics of the n=79 Included Studies

**SUPPLEMENTARY TABLE 4** Relationship Between Increased Cost-Sharing and Adherence, Persistence, and Discontinuation by Disease Area

**SUPPLEMENTARY TABLE 5** Cost-Sharing and Clinical Outcomes

**SUPPLEMENTARY TABLE 6** Cost-Sharing and Healthcare Resource Utilization

**SUPPLEMENTARY TABLE 7** Cost-Sharing and Healthcare Medication Initiation/Uptake

**SUPPLEMENTARY TABLE 8** Cost-Sharing and Healthcare Costs

**Supplemental Figure 1. Relative Change in Adherence by Change in Cost-Sharing by Disease**

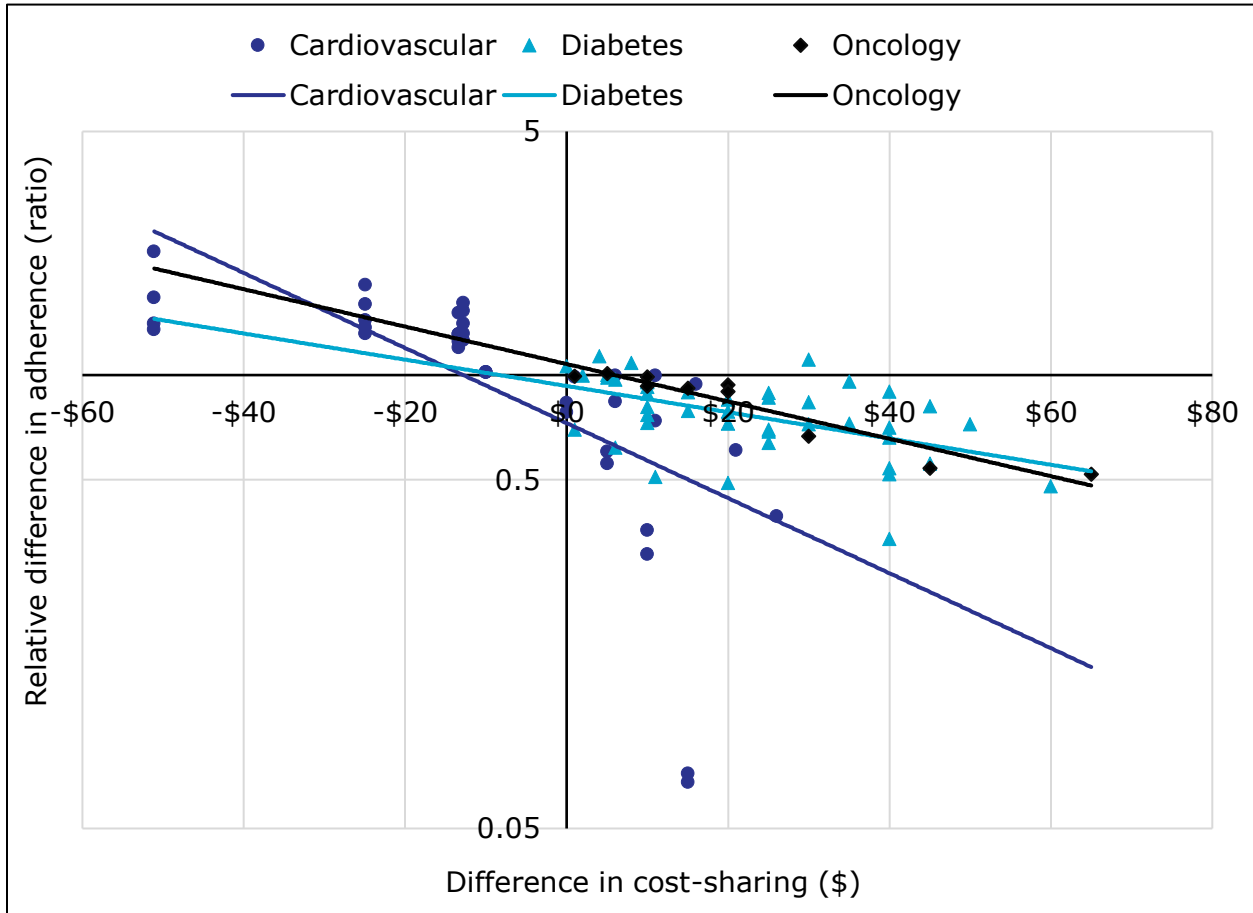

Caption: When the cost-sharing amount was reported as a range, the change in cost-sharing was determined by calculating the difference in the minimums of the 2 categories. For example, when comparing \$6–\$15 with \$0–\$5, the change in cost-sharing would be \$6. Similar trends were identified when the change in cost-sharing was calculated using the difference in the maximums of the 2 categories. The relative change in adherence is the odds ratio, relative risk, or hazard ratio reported in the original study. Adjusted estimates were used when they were reported in the original study. If the study reported nonadherence, the inverse of the ratio is plotted here. The observations on this graph are not all independent; several studies provided multiple data points (e.g., compared several different levels of cost-sharing to a single reference category).

**Supplemental Figure 2. Prescription Discontinuation by Cost-Sharing**

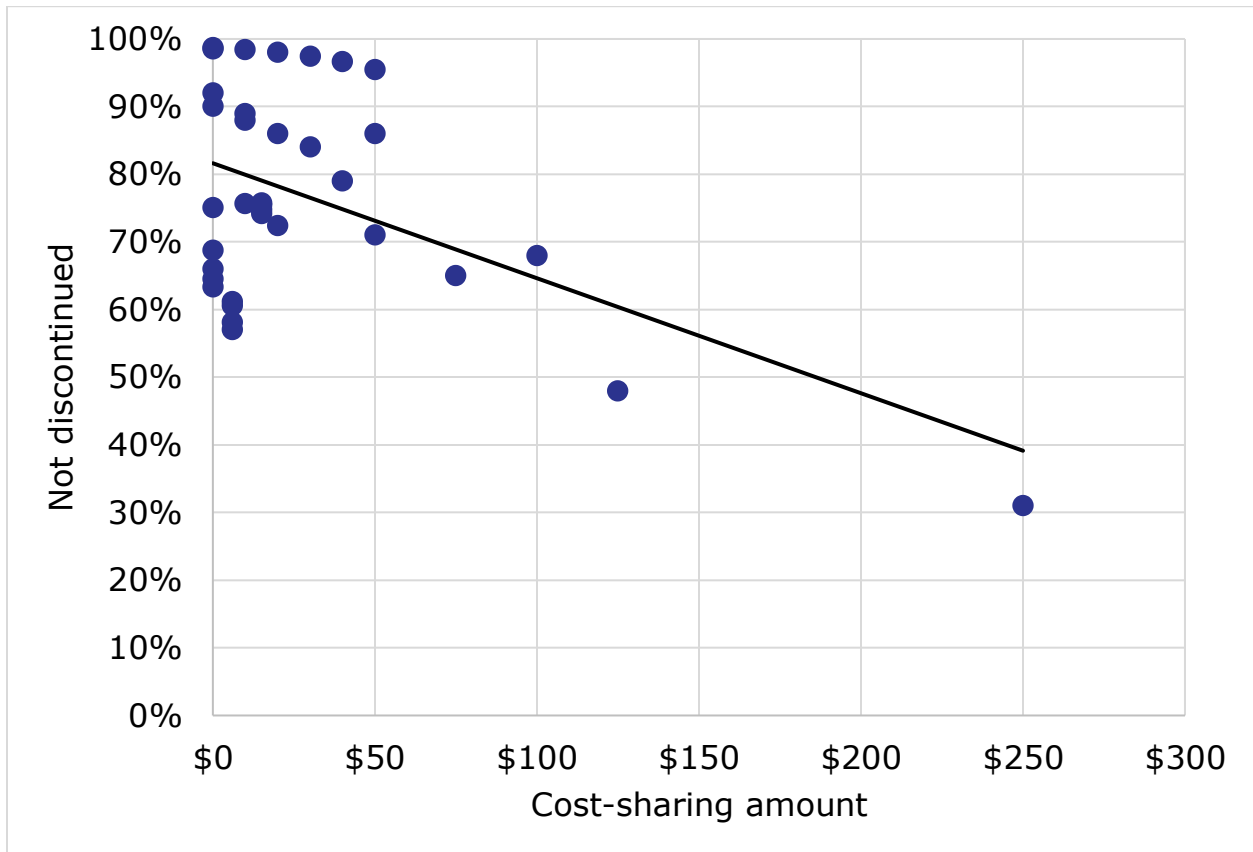

Caption: When cost-sharing was reported as a range, the minimum cost-sharing value was used for this graph. Similar trends were identified when cost-sharing was plotted using the maximum of the cost range. The observations on this graph are not all independent; several studies provided multiple data points (e.g., compared discontinuation for several different levels of cost-sharing). “Discontinuation” includes both patients who began a treatment but stopped picking up prescriptions and patients who were prescribed a medication but never initiated it.

**Supplemental Table 1. Search Strategy**

| Database                                                | Embase and MEDLINE (via Embase.com)                                                                                                                                                                                                                                                                                                                                                                                                                                                                                                                                                                                                                                                                                                                                                          |                         |
|---------------------------------------------------------|----------------------------------------------------------------------------------------------------------------------------------------------------------------------------------------------------------------------------------------------------------------------------------------------------------------------------------------------------------------------------------------------------------------------------------------------------------------------------------------------------------------------------------------------------------------------------------------------------------------------------------------------------------------------------------------------------------------------------------------------------------------------------------------------|-------------------------|
| Date                                                    | May 13, 2020 and (updated) August 18, 2020 <sup>a</sup>                                                                                                                                                                                                                                                                                                                                                                                                                                                                                                                                                                                                                                                                                                                                      |                         |
| Search                                                  | Query                                                                                                                                                                                                                                                                                                                                                                                                                                                                                                                                                                                                                                                                                                                                                                                        | Number of records found |
| #1 (cost-sharing)                                       | 'capitation fee'/exp OR 'co-pay*':ti,ab OR 'copay*':ti,ab OR 'cost-shar*':ti,ab OR 'cost shar*':ti,ab OR 'coinsur*':ti,ab OR 'co-insur*':ti,ab OR 'out-of-pocket':ti,ab OR 'out of pocket':ab,ti OR oop:ab,ti OR 'patient payment*':ab,ti OR 'insurance coverage':ab,ti OR 'deductible*':ab,ti                                                                                                                                                                                                                                                                                                                                                                                                                                                                                               | 27, 562                 |
| #2 (adherence/persistence, discontinuation/abandonment) | 'patient compliance'/exp OR 'patient compliance' OR 'medication compliance'/exp OR 'medication compliance' OR 'treatment refusal'/exp OR 'treatment refusal' OR 'adherence'/exp OR 'adherence' OR 'persistence'/exp OR 'persistence' OR ((patient NEAR/2 (compliance OR adherence OR noncompliance OR nonadherence)):ti,ab) OR ((treatment NEAR/2 (compliance OR adherence OR noncompliance OR nonadherence OR persistence OR abandonment)):ti,ab) OR ((therap* NEAR/2 (compliance OR adherence OR noncompliance OR nonadherence OR persistence OR abandonment)):ti,ab) OR ((regimen NEAR/2 (compliance OR adherence OR noncompliance OR nonadherence OR persistence OR abandonment)):ti,ab) OR ((medication NEAR/2 (compliance OR adherence OR noncompliance OR nonadherence OR persistence | 452,981                 |

| Database              | Embase and MEDLINE (via Embase.com)                                                                                                                                                                                                                                                                                                                                                                                                                                                                                                                                                                                                                                                                                                                                            |                         |
|-----------------------|--------------------------------------------------------------------------------------------------------------------------------------------------------------------------------------------------------------------------------------------------------------------------------------------------------------------------------------------------------------------------------------------------------------------------------------------------------------------------------------------------------------------------------------------------------------------------------------------------------------------------------------------------------------------------------------------------------------------------------------------------------------------------------|-------------------------|
| Date                  | May 13, 2020 and (updated) August 18, 2020 <sup>a</sup>                                                                                                                                                                                                                                                                                                                                                                                                                                                                                                                                                                                                                                                                                                                        |                         |
| Search                | Query                                                                                                                                                                                                                                                                                                                                                                                                                                                                                                                                                                                                                                                                                                                                                                          | Number of records found |
|                       | OR abandonment)):ti,ab) OR ((drug NEAR/2 (compliance OR adherence OR noncompliance OR nonadherence OR persistence OR abandonment)):ti,ab)                                                                                                                                                                                                                                                                                                                                                                                                                                                                                                                                                                                                                                      |                         |
| #3 (clinical outcome) | ((clinical NEAR/5 burden):ab,ti) OR 'clinical outcome*':ab,ti OR 'short term':ab,ti OR 'long term':ab,ti                                                                                                                                                                                                                                                                                                                                                                                                                                                                                                                                                                                                                                                                       | 1,507,770               |
| #4 (HRU and costs)    | 'resource use':ti,ab OR 'resource utilization':ti,ab OR 'resource utilisation':ti,ab OR 'healthcare use':ti,ab OR 'healthcare utilization':ti,ab OR 'healthcare utilisation':ti,ab OR 'healthcare use':ti,ab OR 'healthcare utilization':ti,ab OR 'healthcare utilisation':ti,ab OR 'resource consumption':ti,ab OR 'healthcare consumption':ti,ab OR 'healthcare consumption':ti,ab OR cost:ti,ab OR costs:ti,ab OR costing:ti,ab OR fee:ti,ab OR fees:ti,ab OR budget:ti,ab OR budgets:ti,ab OR budgeting:ti,ab OR expenditure:ti,ab OR expenditures:ti,ab OR expense:ti,ab OR expenses:ti,ab OR spending:ti,ab OR spendings:ti,ab OR economic:ti,ab OR economics:ti,ab OR economical:ti,ab OR pharmacoeconomic:ti,ab OR pharmacoeconomics:ti,ab OR pharmacoeconomical:ti,ab | 1,107,751               |
| #5                    | #2 OR #3 OR #4                                                                                                                                                                                                                                                                                                                                                                                                                                                                                                                                                                                                                                                                                                                                                                 | 2,897,996               |
| #6                    | #1 AND #5                                                                                                                                                                                                                                                                                                                                                                                                                                                                                                                                                                                                                                                                                                                                                                      | 17,308                  |

| Database                             | Embase and MEDLINE (via Embase.com)                                                                                                                                                                                                                                                                                                                                                                                                                                                                                                                                                                                                                       |                         |
|--------------------------------------|-----------------------------------------------------------------------------------------------------------------------------------------------------------------------------------------------------------------------------------------------------------------------------------------------------------------------------------------------------------------------------------------------------------------------------------------------------------------------------------------------------------------------------------------------------------------------------------------------------------------------------------------------------------|-------------------------|
| Date                                 | May 13, 2020 and (updated) August 18, 2020 <sup>a</sup>                                                                                                                                                                                                                                                                                                                                                                                                                                                                                                                                                                                                   |                         |
| Search                               | Query                                                                                                                                                                                                                                                                                                                                                                                                                                                                                                                                                                                                                                                     | Number of records found |
| #7 (real-world studies) <sup>a</sup> | 'longitudinal study'/exp OR 'retrospective study'/exp OR ('prospective study'/exp NOT 'randomized controlled trial'/exp) OR ((cohort NEAR/1 (study OR studies)):ab,ti) OR (('follow up' NEAR/1 (study OR studies)):ab,ti) OR (('cross sectional' NEAR/1 (study OR studies)):ab,ti) OR ((epidemiolog* NEAR/1 (study OR studies)):ab,ti) OR (('case control' NEAR/1 (study OR studies)):ab,ti) OR ((observational NEAR/1 (study OR studies)):ab,ti) OR 'real-world':ab,ti OR database:ab,ti OR registry:ab,ti OR registries:ab,ti OR ((chart NEAR/1 (review OR reviews)):ab,ti) OR 'real world evidence'/exp OR 'real world data'/exp OR 'real world':ab,ti | 2,680,318               |
| #8                                   | #6 AND #7                                                                                                                                                                                                                                                                                                                                                                                                                                                                                                                                                                                                                                                 | 3,703                   |
| #9                                   | #8 NOT ([review]/lim NOT (systematic OR (meta AND analy*)))                                                                                                                                                                                                                                                                                                                                                                                                                                                                                                                                                                                               | 3,640                   |
| #10                                  | #9 AND [humans]/lim                                                                                                                                                                                                                                                                                                                                                                                                                                                                                                                                                                                                                                       | 3,457                   |
| #11                                  | #10 AND [2010-2020]/py                                                                                                                                                                                                                                                                                                                                                                                                                                                                                                                                                                                                                                    | 3,022                   |
| #12                                  | #11 NOT 'conference abstract'/it                                                                                                                                                                                                                                                                                                                                                                                                                                                                                                                                                                                                                          | <b>1,584</b>            |

<sup>a</sup> A protocol amendment was made to update the search strategy to include randomized controlled trials; the following string was added to search #7: 'randomized controlled trial'/exp

OR 'randomized controlled trial' OR 'randomized controlled trial':ab,ti OR 'clinical trial' OR  
'randomized trial'

**Supplemental Table 2. Study Result Categorization**

|                     | Increased Cost-Sharing =<br>Worse Outcome                                   |                                                                             | Increased Cost-Sharing = No<br>Difference in<br>Outcome                         |                                                                                 | Increased Cost-Sharing =<br>Better Outcome                                  |                                                                             |
|---------------------|-----------------------------------------------------------------------------|-----------------------------------------------------------------------------|---------------------------------------------------------------------------------|---------------------------------------------------------------------------------|-----------------------------------------------------------------------------|-----------------------------------------------------------------------------|
|                     | Original<br>Study<br>Reported<br>Effect of<br>Increased<br>Cost-<br>Sharing | Original<br>Study<br>Reported<br>Effect of<br>Decreased<br>Cost-<br>Sharing | Original<br>Study<br>Reported<br>Effect<br>of<br>Increase<br>d Cost-<br>Sharing | Original<br>Study<br>Reported<br>Effect<br>of<br>Decreas<br>ed Cost-<br>Sharing | Original<br>Study<br>Reported<br>Effect of<br>Increased<br>Cost-<br>Sharing | Original<br>Study<br>Reported<br>Effect of<br>Decreased<br>Cost-<br>Sharing |
| <b>Adherence</b>    |                                                                             |                                                                             |                                                                                 |                                                                                 |                                                                             |                                                                             |
| Adherence           | ↓<br>Significantl<br>y lower<br>adherence                                   | ↑<br>Significantl<br>y higher<br>adherence                                  | No<br>statistica<br>lly<br>significa<br>nt<br>differenc<br>e                    | No<br>statistica<br>lly<br>significa<br>nt<br>differenc<br>e                    | ↑<br>Significantl<br>y higher<br>adherence                                  | ↓<br>Significantl<br>y lower<br>adherence                                   |
| Persistence         | ↓<br>Significantl<br>y lower<br>persistence                                 | ↑<br>Significantl<br>y higher<br>persistence                                | No<br>statistica<br>lly<br>significa<br>nt<br>differenc<br>e                    | No<br>statistica<br>lly<br>significa<br>nt<br>differenc<br>e                    | ↑<br>Significantl<br>y higher<br>persistence                                | ↓<br>Significantl<br>y lower<br>persistence                                 |
| Discontinuat<br>ion | ↑<br>Significantl                                                           | ↓<br>Significantl                                                           | No<br>statistica                                                                | No<br>statistica                                                                | ↓<br>Significantl                                                           | ↑<br>Significantl                                                           |



|                          |                                                                |                                                                 |                                                              |                                                              |                                                                 |                                                                |
|--------------------------|----------------------------------------------------------------|-----------------------------------------------------------------|--------------------------------------------------------------|--------------------------------------------------------------|-----------------------------------------------------------------|----------------------------------------------------------------|
|                          | y higher<br>discontinuat<br>ion                                | y lower<br>discontinuat<br>ion                                  | lly<br>significa<br>nt<br>differenc<br>e                     | lly<br>significa<br>nt<br>differenc<br>e                     | y lower<br>discontinuat<br>ion                                  | y higher<br>discontinuat<br>ion                                |
| <b>Clinical Outcomes</b> |                                                                |                                                                 |                                                              |                                                              |                                                                 |                                                                |
| Clinical<br>outcomes     | Patients had<br>significantly<br>worse<br>clinical<br>outcomes | Patients had<br>significantly<br>better<br>clinical<br>outcomes | No<br>statistica<br>lly<br>significa<br>nt<br>differenc<br>e | No<br>statistica<br>lly<br>significa<br>nt<br>differenc<br>e | Patients had<br>significantly<br>better<br>clinical<br>outcomes | Patients had<br>significantly<br>worse<br>clinical<br>outcomes |

Some studies reported both significant and non-significant results within an outcome category. If at least one result within a category was significant, the study was classified as significant. For adherence, persistence, and discontinuation outcomes, where this issue was the most common, these were consistently in the form of assessing multiple levels of cost-sharing where higher levels of cost-sharing reached significance and lower levels did not; these were categorized as significant associations. In figures that display specific results, significant and non-significant results are stratified.

**Supplemental Table 3. Characteristics of the n=79 Included Studies**

| RefID | First Author, Date        | Study Design | Data Source           | Sample Description                                                                                                                           | Study Time Period | Outcomes        | Number of Subjects | Mean Age                                        | % Male   |
|-------|---------------------------|--------------|-----------------------|----------------------------------------------------------------------------------------------------------------------------------------------|-------------------|-----------------|--------------------|-------------------------------------------------|----------|
| 10    | Adams 2013 <sup>21</sup>  | RC           | KPNC                  | Adults who were new users of antihypertensive therapy                                                                                        | 2008              | Adherence       | 44,167             | <50: 41%<br>50-64: 43%<br>65-74: 11%<br>≥75: 5% | 51%      |
| 161   | Bibeau 2016 <sup>22</sup> | RC           | IMS/Amundsen database | Patients with T2D aged 18-85 who initiated ≥1 branded antihyperglycemic products within selected Uniform System of Classification categories | 2011-2014         | Adherence       | 15,416             | Mean range: 47 to 62 years across the 4 strata  | NR       |
| 257   | Cheng 2012 <sup>23</sup>  | RC           | MEPS                  | Patients ≥65 years with ≥1 diagnosis for arthritis or                                                                                        | 2005-2008         | Adherence Costs | 2,484              | 76                                              | 2005: 4% |

| RefID | First Author, Date       | Study Design | Data Source                                     | Sample Description                                                                                                                                                                                                            | Study Time Period | Outcomes        | Number of Subjects | Mean Age                                                 | % Male    |
|-------|--------------------------|--------------|-------------------------------------------------|-------------------------------------------------------------------------------------------------------------------------------------------------------------------------------------------------------------------------------|-------------------|-----------------|--------------------|----------------------------------------------------------|-----------|
|       |                          |              |                                                 | another rheumatic condition who had completed all 5 rounds of the Medical expenditure Panel Survey over 2.5 years                                                                                                             |                   |                 |                    |                                                          | 2008: 35% |
| 265   | Chin 2019 <sup>24</sup>  | RC           | Clinformatics Data Mart Database (OptumInsight) | Female patients who lived in states that enacted oral parity legislation between 2008 and 2013 and who initiated oral endocrine therapy for breast cancer with an index claim 12 months prior to the year the law was enacted | 2007-2014         | Adherence       | 6,900              | 18-44: 13%<br>45-54: ~43%<br>55-59: ~23%<br>60- 64: ~21% | 0%        |
| 281   | Clark 2014 <sup>25</sup> | RC           | A major employer's employee                     | Employees, dependents, and retired plan participants who had                                                                                                                                                                  | 2008-2011         | Adherence Costs | 4,596              | ~56                                                      | 50%       |

| RefID | First Author, Date         | Study Design | Data Source                                            | Sample Description                                                                                                                                                                                                                                                        | Study Time Period | Outcomes  | Number of Subjects | Mean Age                                                 | % Male |
|-------|----------------------------|--------------|--------------------------------------------------------|---------------------------------------------------------------------------------------------------------------------------------------------------------------------------------------------------------------------------------------------------------------------------|-------------------|-----------|--------------------|----------------------------------------------------------|--------|
|       |                            |              | benefits program                                       | coronary artery disease, hyperlipidemia, and/or diabetes participating in disease management and wellness programs addressing diabetes, cardiac conditions, weight management, stress management, exercise, and nutrition (and a matched non-participating control group) |                   |           |                    |                                                          |        |
| 293   | Conwell 2011 <sup>26</sup> | RC           | Medco Health Solutions Medicare beneficiaries database | Women $\geq 65$ with 2 teriparatide fills (and match controls: 2 fills for other osteoporosis medication, or drugs to treat other chronic conditions)                                                                                                                     | 2007              | Adherence | 39,599             | Teriparatide users:<br>65-<70:<br>14% 70-<75:<br>21% 75- | 0%     |

| RefID | First Author, Date        | Study Design | Data Source                            | Sample Description                                                                                                                                      | Study Time Period | Outcomes  | Number of Subjects | Mean Age                                                                        | % Male |
|-------|---------------------------|--------------|----------------------------------------|---------------------------------------------------------------------------------------------------------------------------------------------------------|-------------------|-----------|--------------------|---------------------------------------------------------------------------------|--------|
|       |                           |              |                                        |                                                                                                                                                         |                   |           |                    | <80:<br>25%<br>≥80:<br>40%                                                      |        |
| 303   | Coy 2019 <sup>27</sup>    | RC           | One national chain pharmacy database   | ≥18 with ≥60-day supply of tenofovir disoproxil fumarate and emtricitabine (TDF-FTC) in 2015 and antiretroviral monotherapy with 2 years of viable data | 2015 to 2017      | Adherence | 7,148              | 18-24:<br>11%<br>25-29:<br>22%<br>30-39:<br>35%<br>40-49:<br>20%<br>≥50:<br>12% | 97%    |
| 319   | Darkow 2012 <sup>28</sup> | RC           | Administrative health insurance claims | Aged ≥18 yrs with a diagnosis of chronic                                                                                                                | 1997-2009         | Adherence | 995                | 62                                                                              | 54%    |

| RefID | First Author, Date           | Study Design | Data Source                          | Sample Description                                                                                           | Study Time Period | Outcomes         | Number of Subjects | Mean Age                  | % Male                      |
|-------|------------------------------|--------------|--------------------------------------|--------------------------------------------------------------------------------------------------------------|-------------------|------------------|--------------------|---------------------------|-----------------------------|
|       |                              |              | database covering 45 large employers | myeloid leukemia during 1997 to 2009                                                                         |                   |                  |                    |                           |                             |
| 324   | Daubresse 2017 <sup>29</sup> | RC           | IMS Health LRx LifeLink database     | Incident statin users who initiated branded atorvastatin or rosuvastatin between June 2006 and February 2013 | 2006-2013         | Adherence, Costs | 1.1 mil            | ~50                       | ~45                         |
| 327   | Davis 2017 <sup>30</sup>     | RC           | Walgreens Enterprise Data            | Patients on new statin therapy during the first 3 months of 2012                                             | 2012              | Adherence        | 326,171            | 58-60 depending on strata | 41%-53% depending on strata |
| 367   | Doshi 2018 <sup>31</sup>     | RC           | Symphony Health Solutions'           | Patients with a new, adjudicated pharmacy claim for an oral anticancer agent with prescription               | 2014-2015         | Adherence        | 38,111             | 68                        | 58%                         |

| RefID | First Author, Date         | Study Design | Data Source                                                                                                 | Sample Description                                                     | Study Time Period | Outcomes                 | Number of Subjects | Mean Age | % Male |
|-------|----------------------------|--------------|-------------------------------------------------------------------------------------------------------------|------------------------------------------------------------------------|-------------------|--------------------------|--------------------|----------|--------|
|       |                            |              | Integrated DataVerse                                                                                        | drug coverage through a Medicare Part D or a commercial insurance plan |                   |                          |                    |          |        |
| 400   | Elliott 2013 <sup>32</sup> | PC           | Christiana Care Health System; the largest healthcare provider and the largest private employer in Delaware | Employees and dependents with diabetes                                 | 2009-2010         | All 3 Clinical HRU Costs | 188                | 48       | 36%    |

| RefID | First Author, Date            | Study Design | Data Source                                               | Sample Description                                                                                                                                                                              | Study Time Period | Outcomes  | Number of Subjects | Mean Age                          | % Male |
|-------|-------------------------------|--------------|-----------------------------------------------------------|-------------------------------------------------------------------------------------------------------------------------------------------------------------------------------------------------|-------------------|-----------|--------------------|-----------------------------------|--------|
| 407   | Engel-Nitz 2012 <sup>33</sup> | RC           | OptumInsight                                              | Adults with lung cancer and erlotinib prescriptions filled from November 1, 2004, through December 31, 2008                                                                                     | 2004-2009         | Adherence | 1,460              | ~60                               | NR     |
| 427   | Farias 2017 <sup>34</sup>     | RC           | National Cancer Institute's SEER-Medicare linked database | Women $\geq 65$ with stage I to III hormone receptor-positive breast cancer enrolled in Medicare for at least 12 months before and after they filled their first endocrine therapy prescription | 2007-2009         | Adherence | 8,688              | Median ~75                        | 0      |
| 429   | Farias 2018 <sup>35</sup>     | RC           | Truven Health Analytics MarketScan database               | Women $< 64$ with at least 1 prescription claim for aromatase inhibitors or tamoxifen, who were diagnosed and surgically                                                                        | 2007-2011         | Adherence | 6,863              | 18-39: 8%<br>40-49: 33%<br>50-59: | 0      |



| RefID | First Author, Date          | Study Design | Data Source                            | Sample Description                                                                                                                                                                                                                                   | Study Time Period | Outcomes  | Number of Subjects | Mean Age                                                                                                            | % Male                                    |
|-------|-----------------------------|--------------|----------------------------------------|------------------------------------------------------------------------------------------------------------------------------------------------------------------------------------------------------------------------------------------------------|-------------------|-----------|--------------------|---------------------------------------------------------------------------------------------------------------------|-------------------------------------------|
|       |                             |              |                                        | treated for breast cancer within 12 months before the index claim                                                                                                                                                                                    |                   |           |                    | 41%<br>60-64:<br>17%                                                                                                |                                           |
| 438   | Fendrick 2019 <sup>36</sup> | RC           | IBM MarketScan database                | Patients with T2D                                                                                                                                                                                                                                    | 2013-2014         | Adherence | 2,980              | 53                                                                                                                  | 65%                                       |
| 457   | Fowler 2013 <sup>37</sup>   | RC           | A large health insurer in Pennsylvania | Community-dwelling Medicare beneficiaries $\geq 65$ and continuously enrolled from 2004 to 2007 who filled at least 1 prescription for any drug in 1 of several thousand pharmacies in the insurer's network, where patients received a 15% discount | 2004-2007         | Adherence | 35,102             | 65 to 74:<br>47%-<br>61%<br>75 to 84:<br>34%-<br>44%<br>$\geq 85$<br>years:<br>5%-10%<br>Dependin<br>g on<br>strata | 37%-<br>47%<br>dependin<br>g on<br>strata |

| RefID | First Author, Date          | Study Design | Data Source                                    | Sample Description                                                                                                                                                                                             | Study Time Period | Outcomes  | Number of Subjects | Mean Age                  | % Male                      |
|-------|-----------------------------|--------------|------------------------------------------------|----------------------------------------------------------------------------------------------------------------------------------------------------------------------------------------------------------------|-------------------|-----------|--------------------|---------------------------|-----------------------------|
| 463   | Franklin 2018 <sup>38</sup> | RC           | A linked database of electronic health records | Patients $\geq 65$ with Medicare fee-for service and part D receiving a new prescription or an oral antidiabetic, antihypertensive, statin, asthma/COPD maintenance medication or anti-osteoporosis medication | 2007 to 2014      | Adherence | 32,586             | 75                        | 37%                         |
| 498   | Gibson 2012 <sup>39</sup>   | RC           | Thomson Reuters MarketScan CCAE Database       | 18-64 yrs of age at the time of the first antidepressant prescription claim and had at least 2 medical claims with a depression diagnosis                                                                      | 2005-2008         | HRU       | 48,807             | 38-42 depending on strata | 32%-46% depending on strata |
| 499   | Gibson 2010a <sup>40</sup>  | RC           | MarketScan Commercial Claims                   | Adults with bipolar disorder or schizophrenia during 2003-2006, with $\geq 1$ prescription for one of five                                                                                                     | 2003-2006         | Adherence | 7,910              | 43                        | 38%                         |

| RefID | First Author, Date         | Study Design | Data Source                             | Sample Description                                                                                                               | Study Time Period | Outcomes                  | Number of Subjects           | Mean Age | % Male  |
|-------|----------------------------|--------------|-----------------------------------------|----------------------------------------------------------------------------------------------------------------------------------|-------------------|---------------------------|------------------------------|----------|---------|
|       |                            |              | and Encounters Database                 | approved SGA medications (aripiprazole, olanzapine, quetiapine, risperidone, or ziprasidone)                                     |                   |                           |                              |          |         |
| 501   | Gibson 2010 <sup>b41</sup> | RC           | Thomson Reuters MarketScan Database     | Adults with diabetes who used OAD (sulfonylureas, meglitinides, biguanides, thiazolidinediones, or alpha-glucosidase inhibitors) | 2003-2006         | Adherence                 | 96,734                       | 52       | 54%     |
| 508   | Goedken 2010 <sup>42</sup> | RC           | Web based surveys by Harris Interactive | Adults aged $\geq 65$ yrs and older, US residents, and Medicare beneficiaries                                                    | 2005-2007         | HRU (see report footnote) | 2005 = 1,220<br>2007 = 1,024 | 72       | 42%-46% |
| 520   | Gor 2020 <sup>43</sup>     | RC           | Truven MarketScan administrat           | Patients >30 years with T2D and non-dialysis chronic kidney disease who                                                          | 2009 to 2015      | Adherence                 | 9,019                        | ~57      | 57%-61% |

| RefID | First Author, Date          | Study Design | Data Source                                                          | Sample Description                                                                                                                                         | Study Time Period | Outcomes                 | Number of Subjects | Mean Age                                                 | % Male |
|-------|-----------------------------|--------------|----------------------------------------------------------------------|------------------------------------------------------------------------------------------------------------------------------------------------------------|-------------------|--------------------------|--------------------|----------------------------------------------------------|--------|
|       |                             |              | ive claims database                                                  | initiated therapy with either DPP-4 or pioglitazone                                                                                                        |                   |                          |                    |                                                          |        |
| 569   | Henk 2018 <sup>44</sup>     | RC           | Optum's proprietary research database of medical and pharmacy claims | Adults with T2DM who filled a prescription for a specified novel T2DM medication                                                                           | 2010-2012         | Adherence and HRU, Costs | 36,475             | 54                                                       | 55%    |
| 574   | Hershman 2015 <sup>45</sup> | RC           | OptumInsight insurance claims database                               | Women aged $\geq 50$ yrs who had a diagnosis of non-metastatic invasive breast cancer who had a prescription claim for hormonal therapy (AIs or tamoxifen) | 2007-2011         | Adherence                | 10,302             | 50-55: 29%<br>56-65: 51%<br>66-75: 14%<br>$\geq 75$ : 7% | 0      |

| RefID | First Author, Date          | Study Design | Data Source                                                                | Sample Description                                                                                                                                  | Study Time Period | Outcomes                               | Number of Subjects                                         | Mean Age | % Male |
|-------|-----------------------------|--------------|----------------------------------------------------------------------------|-----------------------------------------------------------------------------------------------------------------------------------------------------|-------------------|----------------------------------------|------------------------------------------------------------|----------|--------|
| 582   | Hopson 2016 <sup>46</sup>   | RC           | The Humana Research Database                                               | Patients aged 18-89 yrs continuously enrolled in the Medicare Advantage and Prescription Drug plan with a primary diagnosis of rheumatoid arthritis | 2007-2012         | Adherence                              | 864                                                        | 64       | 23%    |
| 639   | Johnson 2011 <sup>47</sup>  | RC           | Pharmacy claims database for the Arkansas State Employee Benefits Division | Patients enrolled in a large state employee health plan with stable enrollment who were prescribed proton pump inhibitors                           | 2004 to 2009      | Adherence and HRU Costs (see footnote) | EBD = Mean 127,500 enrolled per month<br>Control = 984,731 | NR       | NR     |
| 640   | Johnston 2012 <sup>48</sup> | RC           | Thomson Reuters MarketSca                                                  | Patients $\geq 18$ and initiated CAR T had no ARV claims in the 6 months prior to the                                                               | 2002-2008         | Adherence                              | 3,731                                                      | 41       | 83%    |

| RefID | First Author, Date               | Study Design | Data Source                            | Sample Description                                                                                                                                                                  | Study Time Period | Outcomes                 | Number of Subjects | Mean Age          | % Male |
|-------|----------------------------------|--------------|----------------------------------------|-------------------------------------------------------------------------------------------------------------------------------------------------------------------------------------|-------------------|--------------------------|--------------------|-------------------|--------|
|       |                                  |              | Commercial Database                    | CAR T initiation date, and had at least 1 medical claim for HIV infection at some point within the period extending from up to 12 months before to 12 months after CAR T initiation |                   |                          |                    |                   |        |
| 667   | Karaca-Mandic 2012 <sup>49</sup> | RC           | Benefits consulting firm (unspecified) | <18 years with asthma                                                                                                                                                               | 1997-2008         | Adherence and HRU, Costs | 8,834              | 7                 | 60%    |
| 670   | Karter 2018 <sup>50</sup>        | RC           | KPNC Diabetes Registry                 | Patients with diabetes and a glucose-, lipid- or blood pressure-lowering therapy                                                                                                    | 2006-2012         | Adherence                | 223,730            | 58                | 53%    |
| 708   | Kim 2018 <sup>51</sup>           | RC           | Blue Cross Blue                        | Women aged 18-64 years with incident early-stage                                                                                                                                    | 2008-2013         | Adherence                | 627                | <40: 5%<br>40-44: | 0      |

| RefID | First Author, Date      | Study Design | Data Source                    | Sample Description                                                                                                                                                                                               | Study Time Period | Outcomes                 | Number of Subjects | Mean Age                                                               | % Male |
|-------|-------------------------|--------------|--------------------------------|------------------------------------------------------------------------------------------------------------------------------------------------------------------------------------------------------------------|-------------------|--------------------------|--------------------|------------------------------------------------------------------------|--------|
|       |                         |              | Shield insurance database      | breast cancer, and lumpectomy followed by radiotherapy, partial mastectomy or mastectomy                                                                                                                         |                   |                          |                    | 9%<br>45-49:<br>19%<br>50-54:<br>25%<br>55-59:<br>33%<br>60-64:<br>10% |        |
| 715   | Kim 2011a <sup>52</sup> | RC           | Large retail employer database | Members of a value-based disease management program with diabetes, coronary artery disease, heart failure or asthma who were over 19; compared with matched control group with the same characteristics who were | 2008              | Adherence and HRU, Costs | 2,552              | <24: 1%<br>25-49:<br>34%<br>50-64:<br>62%<br>≥65: 3%                   | 56%    |

| RefID | First Author, Date      | Study Design | Data Source                                                    | Sample Description                                                                                                  | Study Time Period | Outcomes  | Number of Subjects                                       | Mean Age                       | % Male |
|-------|-------------------------|--------------|----------------------------------------------------------------|---------------------------------------------------------------------------------------------------------------------|-------------------|-----------|----------------------------------------------------------|--------------------------------|--------|
|       |                         |              |                                                                | contacted about the disease management program but did not enroll                                                   |                   |           |                                                          |                                |        |
| 716   | Kim 2011b <sup>53</sup> | RC           | Scott & White Health Plan pharmacy and medical claims database | Adults who used anti-inflammatory, cancer, immunosuppressant, and MS specialty medications for at least 2 years     | NR                | Adherence | 558                                                      | 49 (intervention) 55 (control) | 28%    |
| 779   | Law 2016 <sup>54</sup>  | RC           | MarketScan Commercial Claims and                               | Women aged 15-44 years with any contraceptive usage and pharmacy and medical coverage in years 2011, 2012, and 2013 | 2011-2013         | HRU       | 2011 = 9,320,237<br>2012 = 9,599,891<br>2013 = 8,348,898 | 27                             | 0      |



| RefID | First Author, Date       | Study Design | Data Source                            | Sample Description                                                                                                                                                                                                                                                        | Study Time Period | Outcomes  | Number of Subjects                                                                  | Mean Age | % Male |
|-------|--------------------------|--------------|----------------------------------------|---------------------------------------------------------------------------------------------------------------------------------------------------------------------------------------------------------------------------------------------------------------------------|-------------------|-----------|-------------------------------------------------------------------------------------|----------|--------|
|       |                          |              | Encounters Database                    |                                                                                                                                                                                                                                                                           |                   |           |                                                                                     |          |        |
| 783   | Lee 2016 <sup>55</sup>   | RC           | One large specialty pharmacy in the US | Patients with a diagnosis of multiple myeloma with pharmacy claims for thalidomide, lenalidomide, or pomalidomide                                                                                                                                                         | 2011-2013         | Adherence | 6,731                                                                               | 72       | NR     |
| 805   | Lewey 2018 <sup>56</sup> | RC           | Aetna (insurer)                        | Commercially insured individuals aged >18 years with medical and prescription drug insurance benefits who switched from a typical health insurance plan to an HDHP and filled $\geq 1$ prescription for a medication to treat hypertension, high cholesterol, or diabetes | 2009-2014         | Adherence | HDHP cohort = 14,866<br>Controls = 878,414<br>pool used to match 1:1 to HDHP cohort | 53       | >50%   |

| RefID | First Author, Date         | Study Design | Data Source                                                                                   | Sample Description                                                                                                      | Study Time Period | Outcomes  | Number of Subjects | Mean Age   | % Male     |
|-------|----------------------------|--------------|-----------------------------------------------------------------------------------------------|-------------------------------------------------------------------------------------------------------------------------|-------------------|-----------|--------------------|------------|------------|
|       |                            |              |                                                                                               | mellitus in the 15-month period before their HDHP switch date                                                           |                   |           |                    |            |            |
| 806   | Lewey 2015 <sup>57</sup>   | RC           | A self-insured employer and a control group from Horizon Blue Cross Blue Shield of New Jersey | Patients with diabetes or vascular disease who filled a prescription between Jan 1, 2006 and Dec 31, 2007 plus controls | 2006-2007         | Adherence | 39,281             | Mean 53-59 | 56% to 67% |
| 869   | MacEwan 2017 <sup>58</sup> | RC           | CMS Medicare Research                                                                         | Medicare beneficiaries $\geq 65$ with $\geq 1$ claim for T2D and                                                        | 2006-2009         | Adherence | 12,305             | 74         | 36%        |

| RefID | First Author, Date          | Study Design | Data Source        | Sample Description                                                                                                                                                                                                       | Study Time Period | Outcomes               | Number of Subjects | Mean Age  | % Male |
|-------|-----------------------------|--------------|--------------------|--------------------------------------------------------------------------------------------------------------------------------------------------------------------------------------------------------------------------|-------------------|------------------------|--------------------|-----------|--------|
|       |                             |              | Identifiable Files | at least 1 claim for an antidiabetic medication                                                                                                                                                                          |                   |                        |                    |           |        |
| 890   | Marcus 2018 <sup>59</sup>   | RC           | KPNC               | Patients ≥18 with confirmed hepatitis C                                                                                                                                                                                  | 2014 to 2016      | HRU                    | 14,790             | Median 60 | 61%    |
| 891   | Marcus 2016 <sup>60</sup>   | RC           | KPNC               | Patients initiating tenofovir/emtricitabine PrEP                                                                                                                                                                         | 2012 to 2015      | Adherence and Clinical | 972                | 38        | 98     |
| 895   | Marshall 2018 <sup>61</sup> | RC           | KPNC               | Female patients aged 19-29 years with prescription drug coverage and a new prescription dispensed for a pharmacy-dispensed contraceptive method, the oral contraceptive pill, contraceptive patch, or contraceptive ring | 2011-2014         | Adherence              | 39,142             | 22        | 0      |

| RefID | First Author, Date          | Study Design | Data Source                                                 | Sample Description                                                                                                                                                                                                                         | Study Time Period | Outcomes  | Number of Subjects | Mean Age                                            | % Male |
|-------|-----------------------------|--------------|-------------------------------------------------------------|--------------------------------------------------------------------------------------------------------------------------------------------------------------------------------------------------------------------------------------------|-------------------|-----------|--------------------|-----------------------------------------------------|--------|
| 915   | McCellan 2019 <sup>62</sup> | RC           | IBM MarketScan database                                     | Enrollees aged 12-64 years with prescription drug coverage with no evidence of cancer or palliative care, patients who filled a buprenorphine/naloxone outpatient prescription, either as a sublingual tablet or sublingual or buccal film | 2011-2015         | Adherence | 25,901             | 12-17: 1%<br>18-24: 31%<br>24-44: 44%<br>45-64: 24% | 64.80% |
| 991   | Neugut 2011 <sup>63</sup>   | RC           | Medco Health Solutions pharmacy and medical claims database | Female patients aged $\geq 50$ with early-stage breast cancer with a surgical resection (lumpectomy or mastectomy) within 12 months of the initiation of AI                                                                                | 2007-2008         | Adherence | 22,160             | 50-54: 8%<br>55-59: 15%<br>60-62: 13%<br>63-69: 22% | 0      |

| RefID | First Author, Date      | Study Design | Data Source                          | Sample Description                                                                                                                                                                                                      | Study Time Period | Outcomes | Number of Subjects | Mean Age                                      | % Male |
|-------|-------------------------|--------------|--------------------------------------|-------------------------------------------------------------------------------------------------------------------------------------------------------------------------------------------------------------------------|-------------------|----------|--------------------|-----------------------------------------------|--------|
|       |                         |              |                                      |                                                                                                                                                                                                                         |                   |          |                    | 70-74:15%<br>75-79:14%<br>80-84:9%<br>≥85: 4% |        |
| 1046  | Pace 2016 <sup>64</sup> | RC           | Truven Health MarketScan claims data | Women 18-45 with prescription drug or medical coverage who had a prescription or medical claim for a contraceptive pill, ring, patch, depot medroxyprogesterone injection, or IUD or implant insertion during 2010-2013 | 2010-2013         | HRU      | 3,794,793          | ~29                                           | 0      |

| RefID | First Author, Date           | Study Design | Data Source                                                                         | Sample Description                                                                                                     | Study Time Period | Outcomes          | Number of Subjects | Mean Age | % Male     |
|-------|------------------------------|--------------|-------------------------------------------------------------------------------------|------------------------------------------------------------------------------------------------------------------------|-------------------|-------------------|--------------------|----------|------------|
| 1049  | Palmer 2012 <sup>65</sup>    | RC           | Truven Health Analytics MarketScan Commercial and Medicare databases                | Patients $\geq 18$ with MS diagnosis enrolled in plans with nonzero cost-sharing for disease-modifying therapies (DMT) | 2004-2009         | Adherence and HRU | 24,697             | 45 to 55 | 33% to 37% |
| 1075  | Patterson 2011 <sup>66</sup> | RC           | De-identified data originated from a proprietary database containing administrative | Patients $\geq 50$ years with $\geq 3$ years of continuous B-blocker use without significant treatment discontinuation | 1998-2005         | Adherence         | 2,345              | 67       | 60%        |

| RefID | First Author, Date          | Study Design | Data Source                                                                                  | Sample Description                                                                                                                                                                 | Study Time Period | Outcomes  | Number of Subjects | Mean Age | % Male |
|-------|-----------------------------|--------------|----------------------------------------------------------------------------------------------|------------------------------------------------------------------------------------------------------------------------------------------------------------------------------------|-------------------|-----------|--------------------|----------|--------|
|       |                             |              | ive claims from more than 30 different US healthcare plans across 8 different census regions |                                                                                                                                                                                    |                   |           |                    |          |        |
| 1083  | Pawaskar 2018 <sup>67</sup> | RC           | Administrative claims data from Medicare Part A, B, and D Event Files                        | Medicare fee-for-service beneficiaries $\geq 18$ years with T2D and $\geq 1$ prescription for non-insulin antihyperglycemic agent (AHA) monotherapy under Medicare Part D coverage | 2012-2013         | Adherence | 160,250            | 77       | 48%    |

| RefID | First Author, Date      | Study Design | Data Source                                                                          | Sample Description                                                                                                                             | Study Time Period | Outcomes  | Number of Subjects | Mean Age | % Male |
|-------|-------------------------|--------------|--------------------------------------------------------------------------------------|------------------------------------------------------------------------------------------------------------------------------------------------|-------------------|-----------|--------------------|----------|--------|
|       |                         |              | and the Medicare 100% Master Beneficiary Summary File Chronic Condition Segment file |                                                                                                                                                |                   |           |                    |          |        |
| 1098  | Pesa 2012 <sup>68</sup> | RC           | CHCG database                                                                        | Members of the CHCG database hypertension and at least one prescription for a hypertensive medication following the diagnosis for hypertension | 2006-2008         | Adherence | 28,688             | 50       | 54%    |



| RefID | First Author, Date          | Study Design | Data Source                            | Sample Description                                                                                                                                                     | Study Time Period | Outcomes          | Number of Subjects | Mean Age                                                                | % Male     |
|-------|-----------------------------|--------------|----------------------------------------|------------------------------------------------------------------------------------------------------------------------------------------------------------------------|-------------------|-------------------|--------------------|-------------------------------------------------------------------------|------------|
| 1104  | Phuar 2019 <sup>69</sup>    | RC           | IBM MarketScan Commercial Database     | Patients with chronic myeloid leukemia                                                                                                                                 | 2011-2014         | HRU               | 477                | ~48                                                                     | 44% to 56% |
| 1153  | Reynolds 2016 <sup>70</sup> | RC           | Kaiser Permanente Southern California  | Patients aged $\geq 18$ yrs with diabetes and new to dual oral hyperglycemic agent therapy                                                                             | 2005 to 2010      | Adherence         | 23,612             | 58                                                                      | 56%        |
| 1170  | Roblin 2014 <sup>71</sup>   | RC           | Kaiser Permanente Colorado and Georgia | Females aged 9-26 yrs who obtained KP insurance through a self-pay DHP or HMP selected in 2007. Patients must be HPV vaccine-naïve and enrolled in KP for at least 12- | 2007 to 2009      | Adherence and HRU | 6,209              | 19-26:<br>48-55%<br>16-18:<br>13-15%<br>13-15:<br>13-16%<br>9-12:18-22% | 0          |

| RefID | First Author, Date        | Study Design | Data Source                                                                  | Sample Description                                                                                                                 | Study Time Period | Outcomes                            | Number of Subjects | Mean Age   | % Male |
|-------|---------------------------|--------------|------------------------------------------------------------------------------|------------------------------------------------------------------------------------------------------------------------------------|-------------------|-------------------------------------|--------------------|------------|--------|
|       |                           |              |                                                                              | months prior to 2007 plan selection                                                                                                |                   |                                     |                    |            |        |
| 1179  | Romley 2012 <sup>72</sup> | RC           | Administrative, claims and benefit information from 33 fortune 500 employers | Patients aged $\geq 18$ yrs with MS                                                                                                | 2003 to 2009      | Adherence                           | 3,460              | 42         | 33%    |
| 1202  | Saito 2010 <sup>73</sup>  | RC           | Medical claims database from single health plan in Hawaii                    | Patients with T2D and first filled a prescription for a diabetes-related medication after at least 1 full year prior to enrollment | 2002 to 2007      | Adherence and Clinical <sup>a</sup> | 9,260              | 45-64: 60% | 53%    |

| RefID | First Author, Date               | Study Design | Data Source                                                                         | Sample Description                                                                                                                                   | Study Time Period | Outcomes  | Number of Subjects                                | Mean Age                                               | % Male |
|-------|----------------------------------|--------------|-------------------------------------------------------------------------------------|------------------------------------------------------------------------------------------------------------------------------------------------------|-------------------|-----------|---------------------------------------------------|--------------------------------------------------------|--------|
| 1213  | Sambamoorthi 2017 <sup>74</sup>  | RC           | Humana Medicare Advantage Prescription Drug medical, pharmacy and laboratory claims | Patients $\geq 65$ years on Medicare with T2D and 2 or more claims for basal insulin during the baseline period who newly added RAI to their regimen | 2007 to 2011      | Adherence | 4,979                                             | 65-74: 71%<br>$\geq 75$ : 29%                          | 47%    |
| 1235  | Schmitt Diehl 2015 <sup>75</sup> | CS           | SUPREME-DM Datalink from KPNC, Colorado and Northwest                               | Patients aged $\geq 65$ yrs with diabetes who had 2 or more outpatient diabetes visits within a 2 year window                                        | 2010              | Adherence | ACEI/ARB = 86,210<br>Oral diabetes drugs = 56,629 | 65-69: 31-32%<br>70-74: 27%<br>75-79: 20-21%<br>80-84: | ~51%   |

| RefID | First Author, Date        | Study Design | Data Source                                                             | Sample Description                                                                                                                            | Study Time Period | Outcomes  | Number of Subjects | Mean Age                                                               | % Male |
|-------|---------------------------|--------------|-------------------------------------------------------------------------|-----------------------------------------------------------------------------------------------------------------------------------------------|-------------------|-----------|--------------------|------------------------------------------------------------------------|--------|
|       |                           |              |                                                                         |                                                                                                                                               |                   |           | Statins = 93,276   | 13-14%<br>>85: 8%                                                      |        |
| 1256  | Shah 2019 <sup>76</sup>   | RC           | Specialty pharmacy claims and electronic medical records                | Patients aged $\geq 18$ yrs with pulmonary hypertension who received medication through a specialty pharmacy                                  | 2014-2016         | Adherence | 131                | Median: 55                                                             | 30%    |
| 1280  | Shrank 2010 <sup>77</sup> | CS           | One large retail pharmacy chain and one large pharmacy benefits manager | Patients who filled a first prescription for new medications for which no prescriptions had been filled in the 6 months before the index date | 2008              | Adherence | 5,249,380          | 0-17: 12%<br>18-34: 15%<br>35-49: 23%<br>50-64: 29%<br>$\geq 65$ : 21% | 40%    |

| RefID | First Author, Date         | Study Design | Data Source                                                                      | Sample Description                                                                                                                                                                                            | Study Time Period | Outcomes                 | Number of Subjects | Mean Age | % Male |
|-------|----------------------------|--------------|----------------------------------------------------------------------------------|---------------------------------------------------------------------------------------------------------------------------------------------------------------------------------------------------------------|-------------------|--------------------------|--------------------|----------|--------|
| 1308  | Snider 2016 <sup>78</sup>  | RC           | Longitudinal database of medical and pharmacy claims from self-insured employers | Patients 18-64 years with T2D                                                                                                                                                                                 | 2004-2012         | Adherence and HRU, Costs | 92,410             | 53       | 56%    |
| 1327  | Starner 2014 <sup>79</sup> | RC           | Single pharmacy benefit manager prescription records                             | Privately insured patients with an adjudicated pharmacy claim for a biologic anti-inflammatory (abatacept, adalimumab, alefacept, anakinra, certolizumab pegol, etanercept, golimumab, infliximab, rituximab, | 2013              | Adherence                | 264,801            | NR       | NR     |

| RefID | First Author, Date       | Study Design | Data Source                       | Sample Description                                                                                                                                                                                                                                             | Study Time Period | Outcomes  | Number of Subjects | Mean Age   | % Male  |
|-------|--------------------------|--------------|-----------------------------------|----------------------------------------------------------------------------------------------------------------------------------------------------------------------------------------------------------------------------------------------------------------|-------------------|-----------|--------------------|------------|---------|
|       |                          |              |                                   | tocilizumab, or ustekinumab) or MS specialty drug (fingolimod, glatiramer acetate, interferon beta-1a, interferon beta-1b, or natalizumab), newly initiating or restarting their drug and enrolled in a health plan 180 days before and after their index date |                   |           |                    |            |         |
| 1330  | Stein 2015 <sup>80</sup> | RC           | Clinformatics DataMart Database   | Patients >40 with open-angle glaucoma                                                                                                                                                                                                                          | 2009-2012         | Adherence | 8,427              | 66         | 48%     |
| 1359  | Taira 2017 <sup>81</sup> | RC           | Administrative claims database of | Patients with diabetes who were all taking oral antidiabetic medications,                                                                                                                                                                                      | 2008-2010         | Adherence | 5,136              | Mean 63-72 | 41%-59% |

| RefID | First Author, Date        | Study Design | Data Source                                       | Sample Description                                                                                                                                               | Study Time Period | Outcomes  | Number of Subjects | Mean Age | % Male |
|-------|---------------------------|--------------|---------------------------------------------------|------------------------------------------------------------------------------------------------------------------------------------------------------------------|-------------------|-----------|--------------------|----------|--------|
|       |                           |              | members enrolled in a large health plan in Hawaii | antihypertensive medications and cholesterol lowering medications                                                                                                |                   |           |                    |          |        |
| 1371  | Tao 2018 <sup>82</sup>    | RC           | Humana Inc. health plan claims                    | Patients aged 65-90 years, enrolled in Medicare Advantage Part D or Medicare Part D only health plan, who were eligible for the herpes zoster vaccine due to age | 2007-2014         | Adherence | 6,295,970          | 73       | 59%    |
| 1417  | Vaidya 2013 <sup>83</sup> | RC           | Medstat Marketscan databases                      | Patients with asthma, with an inhaled corticosteroids event but no long-acting beta-2-agonist or leukotriene receptor antagonist in 6 months                     | 2000-2001         | Adherence | 1,447              | 37       | 40%    |

| RefID | First Author, Date        | Study Design | Data Source                           | Sample Description                                                                                                                                                   | Study Time Period | Outcomes  | Number of Subjects | Mean Age                                   | % Male |
|-------|---------------------------|--------------|---------------------------------------|----------------------------------------------------------------------------------------------------------------------------------------------------------------------|-------------------|-----------|--------------------|--------------------------------------------|--------|
|       |                           |              |                                       | prior to the index date, but at least one inhaled corticosteroid event with a long-acting beta-2-agonist or leukotriene receptor antagonist in the post-index period |                   |           |                    |                                            |        |
| 1461  | Wang 2013 <sup>84</sup>   | RC           | MedImpact Healthcare Systems Database | Patients aged $\geq 18$ yrs with at least 1 rejected prescription claim for febuxostat                                                                               | 2009-2010         | Adherence | 1,034              | 18-39: 7%<br>40-64: 52%<br>$\geq 65$ : 41% | 73.40% |
| 1493  | Wharam 2019 <sup>85</sup> | RC           | Optum claims data                     | Women in low-deductible plans for 1 year who were switched to HDHP for an additional 1 month to 4 years. The control group                                           | 2003-2014         | HRU       | 1.5 mil            | ~45                                        | 0      |



| RefID | First Author, Date      | Study Design | Data Source                | Sample Description                                                                                                                                                                                                                                                                                                                   | Study Time Period | Outcomes  | Number of Subjects | Mean Age                       | % Male |
|-------|-------------------------|--------------|----------------------------|--------------------------------------------------------------------------------------------------------------------------------------------------------------------------------------------------------------------------------------------------------------------------------------------------------------------------------------|-------------------|-----------|--------------------|--------------------------------|--------|
|       |                         |              |                            | consisted of women matched by propensity of employer to manage HDHPs, baseline OOP spending, baseline screening mammogram or breast cancer diagnosis and treatment, follow-up duration, income level, rural vs urban location, racial profile of area, health savings or reimbursement accounts who remained on low-deductible plans |                   |           |                    |                                |        |
| 1534  | Yang 2011 <sup>86</sup> | RC           | Thomson Reuters MarketScan | Patients $\geq 18$ , with a diagnosis of hypertension and were initiated on a                                                                                                                                                                                                                                                        | 2006-2008         | Adherence | 381,661            | Age by copayment group (mean): | ~46    |

| RefID | First Author, Date | Study Design | Data Source                                    | Sample Description                                 | Study Time Period | Outcomes | Number of Subjects | Mean Age                                                                                                                          | % Male |
|-------|--------------------|--------------|------------------------------------------------|----------------------------------------------------|-------------------|----------|--------------------|-----------------------------------------------------------------------------------------------------------------------------------|--------|
|       |                    |              | Commercial and Medicare Supplemental Databases | single pill combination antihypertensive treatment |                   |          |                    | Low = 58.8 years, 29.8% $\geq 65$ years<br>Medium = 55.6 years, 19.4% $\geq 65$ years<br>High = 55.8 years, 19.2% $\geq 65$ years |        |

| RefID | First Author, Date       | Study Design | Data Source                           | Sample Description                                                                                                                                                                                                                                                                   | Study Time Period | Outcomes  | Number of Subjects | Mean Age | % Male |
|-------|--------------------------|--------------|---------------------------------------|--------------------------------------------------------------------------------------------------------------------------------------------------------------------------------------------------------------------------------------------------------------------------------------|-------------------|-----------|--------------------|----------|--------|
| 1564  | Zheng 2011 <sup>87</sup> | RC           | MedImpact Healthcare Systems Database | Patients aged $\geq 18$ years naïve to varenicline who had a full drug benefit and a reversed varenicline claim, continuous enrollment in the same health plan 1 year before and 183 days after reversed claim, and with coverage for over the counter smoking cessation medications | 2007-2008         | Adherence | 20,451             | 48       | 43%    |
| 1565  | Zheng 2012 <sup>88</sup> | RC           | MedImpact Healthcare Systems Database | Patients aged 18-64 yrs in commercial home maintenance organizations who started an atypical antipsychotic and were                                                                                                                                                                  | 2003-2008         | Adherence | 15,898             | 42       | ~40    |

| RefID | First Author, Date          | Study Design   | Data Source     | Sample Description                                                                                                                                                                             | Study Time Period | Outcomes                    | Number of Subjects | Mean Age           | % Male  |
|-------|-----------------------------|----------------|-----------------|------------------------------------------------------------------------------------------------------------------------------------------------------------------------------------------------|-------------------|-----------------------------|--------------------|--------------------|---------|
|       |                             |                |                 | previously naïve to antipsychotics                                                                                                                                                             |                   |                             |                    |                    |         |
| 2002  | Choudry 2011 <sup>89</sup>  | RCT (MI FREEE) | Aetna (insurer) | Patients receiving both medical and prescription drug benefits through Aetna, discharged from the hospital with a principal or secondary diagnosis of MI and a length of stay of 3 to 180 days | 2007-2010         | Adherence<br>Clinical Costs | 5,855              | 54                 | 75%     |
| 2003  | Choudry 2014 <sup>90</sup>  | RCT (MI FREEE) | Aetna (insurer) | As Choudhry 2011 #2002                                                                                                                                                                         | 2007-2010         | Adherence<br>Clinical Costs | 5,855              | 54                 | 75%     |
| 2004  | Fanaroff 2020 <sup>91</sup> | RCT (ARTEMIS)  | ARTEMIS trial   | Aged ≥18 yrs old, diagnosed with ST-segment elevation MI or non-ST-segment elevation                                                                                                           | 2015-2016         | Adherence                   | 10,102             | As Wang 2019 #2008 | As Wang |

| RefID | First Author, Date            | Study Design   | Data Source                                       | Sample Description                                                                                                                                                        | Study Time Period | Outcomes                       | Number of Subjects                                | Mean Age       | % Male        |
|-------|-------------------------------|----------------|---------------------------------------------------|---------------------------------------------------------------------------------------------------------------------------------------------------------------------------|-------------------|--------------------------------|---------------------------------------------------|----------------|---------------|
|       |                               |                |                                                   | MI, discharged on a P2Y inhibitor (clopidogrel, prasugrel, or ticagrelor), had US-based health insurance coverage with a prescription drug benefit,                       |                   |                                |                                                   |                | 2019<br>#2008 |
| 2006  | Kulik 2013 <sup>92</sup>      | RCT (MI FREEE) | MI FREEE trial population                         | NR: Secondary analysis of MIFREE trial                                                                                                                                    | Unclear           | Adherence<br>Clinical<br>Costs | 5,855                                             | Mean:<br>53-55 | 75%           |
| 2007  | Ross-Degan 2020 <sup>93</sup> | RC             | Commercial and Medicare Advantage Claims database | Patients aged 12-64 yrs with diabetes and commercial insurance on HDHP through their employer or parent's employer (HDHP defined as annual deductibles of $\geq$ \$1,000) | 2005-2014         | Adherence                      | HDHP with PDL = 1,744<br>Matched controls = 3,349 | 51             | 57%           |

| RefID   | First Author, Date      | Study Design | Data Source                      | Sample Description                                                                                                                                                                                                                                                                                                      | Study Time Period                | Outcomes               | Number of Subjects | Mean Age   | % Male |
|---------|-------------------------|--------------|----------------------------------|-------------------------------------------------------------------------------------------------------------------------------------------------------------------------------------------------------------------------------------------------------------------------------------------------------------------------|----------------------------------|------------------------|--------------------|------------|--------|
| 2008    | Wang 2019 <sup>94</sup> | Cluster RCT  | ARTEMIS trial                    | Aged $\geq 18$ yrs, diagnosed with ST-segment elevation MI or non-ST-segment elevation MI, discharged on a P2Y inhibitor (clopidogrel, prasugrel, or ticagrelor), had US-based health insurance coverage with a prescription drug benefit, and were able to provide written informed consent for longitudinal follow-up | 1-year follow-up after discharge | Adherence and Clinical | 10,102             | Median: 62 | 69%    |
| IQVIA-9 | IQVIA-9 <sup>95</sup>   | RC           | IQVIA Formulary Analyzer Dataset | Commercially insured patients newly accessing branded medications                                                                                                                                                                                                                                                       | 2013 to 2017                     | Adherence              | NR                 | NR         | NR     |

| RefID | First Author, Date          | Study Design | Data Source                                                                | Sample Description                                                                                                                                                                                                                                              | Study Time Period | Outcomes  | Number of Subjects | Mean Age                                                                                   | % Male                                                               |
|-------|-----------------------------|--------------|----------------------------------------------------------------------------|-----------------------------------------------------------------------------------------------------------------------------------------------------------------------------------------------------------------------------------------------------------------|-------------------|-----------|--------------------|--------------------------------------------------------------------------------------------|----------------------------------------------------------------------|
| 186   | Brixner, 2019 <sup>96</sup> | RC           | AbbVie patient support program linked medical and pharmacy claims database | Patients aged $\geq 18$ yrs with a first adalimumab claim, with a diagnosis of an autoimmune disease (Crohn's disease, ulcerative colitis, rheumatoid arthritis, psoriasis, psoriatic arthritis, ankylosing, spondylitis, hidradenitis, suppurativa or uveitis) | 2015-2017         | Adherence | 17,371             | Patient support program = $45.6 \pm 13.3$<br>Non-patient support program = $46.4 \pm 13.9$ | Patient support program = 38.7%<br>Non-patient support program = 39% |
| 199   | Burton, 2014 <sup>97</sup>  | RC           | Administrative claims database affiliated with large US managed            | Patients aged $\geq 18$ yrs with $\geq 2$ claims for either metoprolol or carvedilol, with $\geq 1$ medical claim for atrial fibrillation during baseline. Metoprolol group had $\geq 1$ claim for acute MI,                                                    | 2008-2010         | Adherence | 16,014             | Metroprolol = $70.2 \pm 12.1$<br>Carvedilol = $70.4 \pm 11.7$                              | Metroprolol = 58.9%<br>Carvedilol = 68.7%                            |

| RefID | First Author, Date             | Study Design | Data Source                                          | Sample Description                                                                                           | Study Time Period | Outcomes  | Number of Subjects                                                  | Mean Age                                  | % Male                                 |
|-------|--------------------------------|--------------|------------------------------------------------------|--------------------------------------------------------------------------------------------------------------|-------------------|-----------|---------------------------------------------------------------------|-------------------------------------------|----------------------------------------|
|       |                                |              | care health plan                                     | angina, heart failure or hypertension; carvedilol group had $\geq 1$ claim for heart failure or hypertension |                   |           |                                                                     |                                           |                                        |
| 203   | Buxbaum, 2018 <sup>98</sup>    | RC           | MarketScan Commercial Claims and Encounters Database | Patients with major depressive disorder and 1 claim for a generic antidepressant                             | 2012-2014         | Adherence | 2012: 674,468<br>2013: 583,455<br>2014: 644,254<br>Total: 1,902,177 | Mean age = 44.2 $\pm$ 12.7 yrs            | 2012 = 31%<br>2013 = 30%<br>2014 = 30% |
| 1430  | VanderBeek, 2020 <sup>99</sup> | RC           | Clinformatics Data Mart Database                     | Patients aged $\geq 18$ yrs with a new diagnosis of diabetic macular edema                                   | 2013-2016         | HRU       | 6,220                                                               | Mean age range (categorized by treatment) | Range (categorized by gender):         |



| RefID | First Author, Date | Study Design | Data Source | Sample Description | Study Time Period | Outcomes | Number of Subjects | Mean Age         | % Male  |
|-------|--------------------|--------------|-------------|--------------------|-------------------|----------|--------------------|------------------|---------|
|       |                    |              |             |                    |                   |          |                    | ); 62.5-65.9 yrs | 48%-62% |

Note: Goedken 2010, reporting HRU data and Johnson 2011, reporting cost data met the PICOS criteria for inclusion; however, the reported data did not conceptually align with the other summarized in the respective sections and are therefore only included as footnotes, these 2 studies are included in the n=23 reporting clinical outcomes, HRU, and/or costs.

<sup>a</sup> Saito was originally categorized under “clinical outcomes” but was subsequently removed from category; study found that switches to drugs of equal or lesser copay cost differed significantly by glycemic control status ( $P<0.001$ ), suggesting that patients with A1C  $>7\%$  (i.e., poorer glycemic control) were less affected by increases in copayment than patients with A1C  $<7\%$ . For each \$5 difference in OOP costs, patients with A1C  $<7\%$  were 7% more likely to switch to drugs with  $\leq$  copayments. Effect was magnified as copayment increased. Patients with a \$20 higher copayment were 28% more likely to switch to a drug of equal or lesser cost. Authors posit that “results may reflect differences in the willingness of patients with less controlled disease to disrupt their existing therapy by switching to a new drug, even within an essential class of medications. Conversely, the findings also may suggest that patients with well-controlled diabetes are considering factors such as long-term costs and exploring less expensive alternatives.”

Key: AI – aromatase inhibitor; ARC – antiretroviral; CCAE – Commercial Claims and Encounters; CHCG – Consolidated Health Cost Guidelines; CAR T – Chimeric antigen receptor T-cell; CS – cross-sectional; DHP – deductible health plan; HMP – HMO plan; KPNC – Kaiser Permanente Northern California; MEPS – Medical Expenditure Panel Survey; MI – myocardial infarction; MS – multiple sclerosis; OAD – oral antidiabetic; PICOS – population, intervention, comparator, study design; PC – prospective cohort; RC – retrospective cohort; RCT – randomized controlled trial; SG – second-generation antipsychotics; SUPREME-DM – Surveillance,

Prevention, and Management of Diabetes Mellitus; T2D – type 2 diabetes; HRU – healthcare resource utilization; SEER – Surveillance, Epidemiology, and End Results; IMS – Intercontinental Medical Statistics; US – United States; CMS – Centers for Medicare & Medicaid Services; NR – not recorded; yrs – years.

**Supplemental Table 4. Relationship Between Increased Cost-Sharing and Adherence, Persistence, and Discontinuation by Disease Area**

|                      | Adherence, n (%)<br>N=63 studies |                                      | Persistence, n (%)<br>N=19 studies |                                        | Discontinuation, n (%)<br>N=19 studies |                                            |
|----------------------|----------------------------------|--------------------------------------|------------------------------------|----------------------------------------|----------------------------------------|--------------------------------------------|
|                      | Number of Articles               | Number (%) Reporting Worse Adherence | Number of Articles                 | Number (%) Reporting Worse Persistence | Number of Articles                     | Number (%) Reporting Worse Discontinuation |
| Diabetes             | 13                               | 12 (92)                              | 4                                  | 4 (100)                                | 5                                      | 4 (80)                                     |
| Cardiovascular       | 12                               | 9 (75)                               | 3                                  | 3 (100)                                | 3                                      | 1 (33)                                     |
| Oncology             | 10                               | 8 (80)                               | 5                                  | 2 (40)                                 | 4                                      | 1 (25)                                     |
| Mixed/No restriction | 6                                | 6 (100)                              | 1                                  | 0 (0)                                  | 2                                      | 1 (50)                                     |
| Infectious Diseases  | 4                                | 4 (100)                              | 2                                  | 2 (100)                                | 1                                      | 0 (0)                                      |
| Mental Health        | 4                                | 3 (75)                               | 2                                  | 2 (100)                                | 1                                      | 1 (100)                                    |
| Arthritis            | 2                                | 2 (100)                              | 1                                  | 1 (100)                                | 1                                      | 1 (100)                                    |
| Multiple Sclerosis   | 2                                | 2 (100)                              | 1                                  | 1 (100)                                | 2                                      | 2 (100)                                    |
| Respiratory          | 2                                | 2 (100)                              | 0                                  | N/A                                    | 0                                      | N/A                                        |
| Autoimmune           | 1                                | 1 (100)                              | 0                                  | N/A                                    | 0                                      | N/A                                        |
| Reproductive Health  | 1                                | 1 (100)                              | 0                                  | N/A                                    | 0                                      | N/A                                        |
| Dementia             | 1                                | 1 (100)                              | 0                                  | N/A                                    | 0                                      | N/A                                        |

|                      | Adherence, n (%) |         | Persistence, n (%) |     | Discontinuation, n (%) |     |
|----------------------|------------------|---------|--------------------|-----|------------------------|-----|
|                      | N=63 studies     |         | N=19 studies       |     | N=19 studies           |     |
| Eyes and Vision      | 1                | 1 (100) | 0                  | N/A | 0                      | N/A |
| Smoking Cessation    | 1                | 1 (100) | 0                  | N/A | 0                      | N/A |
| Gastrointestina<br>l | 1                | 0 (0)   | 0                  | N/A | 0                      | N/A |
| Gout                 | 1                | 0 (0)   | 0                  | N/A | 0                      | N/A |
| Osteoporosis         | 1                | 0 (0)   | 0                  | N/A | 0                      | N/A |

**Supplemental Table 5. Cost-Sharing and Clinical Outcomes**

| First Author and Year      | Clinical Outcome                                  | Comparator Group                           | Comparator Cost-Sharing                                                                                 | Intervention Group                               | Intervention Cost-Sharing                  | Result                                           |
|----------------------------|---------------------------------------------------|--------------------------------------------|---------------------------------------------------------------------------------------------------------|--------------------------------------------------|--------------------------------------------|--------------------------------------------------|
| Copay Difference           |                                                   |                                            |                                                                                                         |                                                  |                                            |                                                  |
| Marcus 2016                | eGFR among HIV pre-exposure prophylaxis           | Low copay                                  | <\$50                                                                                                   | High copay                                       | ≥\$50                                      | No statistically significant difference          |
| Cost-Sharing Eliminated    |                                                   |                                            |                                                                                                         |                                                  |                                            |                                                  |
| Elliott 2013 <sup>32</sup> | Hypoglycemic control among patients with diabetes | Pre-implementation of copay elimination    | \$10 – generics <sup>a</sup><br>\$25 – preferred brand <sup>a</sup><br>\$50 – nonformulary <sup>a</sup> | 1-years post-implementation of copay elimination | \$0 copays                                 | No statistically significant difference in HbA1c |
| Wang 2019                  | MACE (death, recurrent heart attack, or stroke)   | Usual care patients without copay vouchers | No voucher                                                                                              | Copay vouchers for clopidogrel or ticagrelor     | Median monthly voucher: \$137 (\$20-\$339) | No significant difference in MACE at 1 year      |

| First Author and Year                                               | Clinical Outcome                                                                        | Comparator Group            | Comparator Cost-Sharing                                                | Intervention Group         | Intervention Cost-Sharing | Result                                                                                               |
|---------------------------------------------------------------------|-----------------------------------------------------------------------------------------|-----------------------------|------------------------------------------------------------------------|----------------------------|---------------------------|------------------------------------------------------------------------------------------------------|
| Choudhry 2011<br><i>(same study as Choudry 2014 and Kulik 2013)</i> | Heart attack, angina, stroke, heart failure, revascularization or death                 | Usual prescription coverage | ACE inhibitor/ARB: \$13.35<br>Beta-blocker: \$12.83<br>Statin: \$24.92 | Full prescription coverage | \$0 cost-sharing          | Fewer major vascular events, stroke; other outcomes non-significant                                  |
| Choudhry 2014<br><i>(same study as Choudry 2011 and Kulik 2013)</i> | Readmission for heart attack, angina, stroke, heart failure, revascularization or death | Usual prescription coverage | ACE inhibitor/ARB: \$13.35<br>Beta-blocker: \$12.83<br>Statin: \$24.92 | Full prescription coverage | \$0 cost-sharing          | Reduced major vascular events or revascularization in nonwhite patients; no effect in white patients |
| Kulik 2013<br><i>(same study as Choudry 2011)</i>                   | Heart attack, angina, stroke, revascularization                                         | Usual prescription coverage | ACE inhibitor/ARB: \$13.35                                             | Full prescription coverage | \$0 cost-sharing          | Nonsignificant reductions                                                                            |

| First Author and Year    | Clinical Outcome | Comparator Group | Comparator Cost-Sharing                         | Intervention Group | Intervention Cost-Sharing | Result |
|--------------------------|------------------|------------------|-------------------------------------------------|--------------------|---------------------------|--------|
| <i>and Choudry 2014)</i> |                  |                  | Beta-blocker:<br>\$12.83<br><br>Statin: \$24.92 |                    |                           |        |

<sup>a</sup> For 30-day supply; 90-day, costs were \$25, \$63, and \$125, respectively; the proportion of participants with > \$200 in monthly OOP costs decreased from 35.1% to 20.2%, and those reporting < \$100/ month increased from 22.9% to 48.4%.

Key: ACE – angiotensin-converting enzyme; ARB – angiotensin-receptor blocker; eGFR – estimated glomerular filtration rate; MACE – major adverse cardiac event; OOP – out-of-pocket.

**Supplemental Table 6. Cost-Sharing and Healthcare Resource Utilization**

| Study                           | HRU Outcome                                            | Lower Cost-Sharing Group                                    | Lower Cost-Sharing | Higher Cost-Sharing Group                                  | Higher Cost-Sharing | Result                                                                                                                                                                                 | Hospitalizations Outpatient ED Visits |    |         |
|---------------------------------|--------------------------------------------------------|-------------------------------------------------------------|--------------------|------------------------------------------------------------|---------------------|----------------------------------------------------------------------------------------------------------------------------------------------------------------------------------------|---------------------------------------|----|---------|
|                                 |                                                        |                                                             |                    |                                                            |                     |                                                                                                                                                                                        |                                       |    |         |
| Karaca-Manic 2012 <sup>49</sup> | Medication and hospital use among children with asthma | Lowest quartile of OOP asthma medication costs (comparator) | \$100              | Highest quartile of asthma medication costs (intervention) | \$190               | <b>Significant increase in asthma-related hospitalizations for children 5–18 years; no significant difference for children &lt;5; no significant differences in ED use; non-asthma</b> | X                                     | NR | Not Sig |



| Study                   | HRU Outcome                                                           | Lower Cost-Sharing Group                | Lower Cost-Sharing    | Higher Cost-Sharing Group                               | Higher Cost-Sharing | Result                                                                                                                        | Hospitalizations |          |         |
|-------------------------|-----------------------------------------------------------------------|-----------------------------------------|-----------------------|---------------------------------------------------------|---------------------|-------------------------------------------------------------------------------------------------------------------------------|------------------|----------|---------|
|                         |                                                                       |                                         |                       |                                                         |                     |                                                                                                                               |                  |          |         |
|                         |                                                                       |                                         |                       |                                                         |                     | hospitalizations;<br><i>(Higher OOP = lower med use)</i>                                                                      |                  |          |         |
| Henk 2018 <sup>44</sup> | Inpatient stay, ER and ambulatory visits among patients with diabetes | Fixed copay Or Coinsurance (comparator) | \$30 coinsurance mean | Highest copay in fixed 3-tier copay plan (intervention) | \$54.54 copay       | Higher 3-tier copay <b>significantly fewer ambulatory visits</b> ; no significant difference in hospitalizations or ED visits | Not Sig          | <b>X</b> | Not Sig |

| Study                     | HRU Outcome                      | Lower Cost-Sharing Group                                       | Lower Cost-Sharing | Higher Cost-Sharing Group                            | Higher Cost-Sharing                                                                                               | Result                                                     | Hospitalizat Outpatient ED Visits |    |         |
|---------------------------|----------------------------------|----------------------------------------------------------------|--------------------|------------------------------------------------------|-------------------------------------------------------------------------------------------------------------------|------------------------------------------------------------|-----------------------------------|----|---------|
|                           |                                  |                                                                |                    |                                                      |                                                                                                                   |                                                            | ions                              |    |         |
| Elliot 2013 <sup>32</sup> | HRU among patients with diabetes | 1-year post-implementation of copay elimination (intervention) | \$0 copays         | Pre-implementation of copay elimination (comparator) | Copays: \$10 – generic medications<br>\$25 – preferred brand medications<br>\$50 – nonformulary brand medications | Non-significant increase in hospitalizations and ED visits | Not Sig                           | NR | Not Sig |

| Study                     | HRU Outcome                                                                | Lower Cost-Sharing Group           | Lower Cost-Sharing                                                          | Higher Cost-Sharing Group                  | Higher Cost-Sharing                                                               | Result                                                                                               | Hospitalizat Outpatient ED Visits |          |         |
|---------------------------|----------------------------------------------------------------------------|------------------------------------|-----------------------------------------------------------------------------|--------------------------------------------|-----------------------------------------------------------------------------------|------------------------------------------------------------------------------------------------------|-----------------------------------|----------|---------|
|                           |                                                                            |                                    |                                                                             |                                            |                                                                                   |                                                                                                      | ions                              |          |         |
| Kim 2011a <sup>52</sup>   | Medical utilization among employees offered copayment waivers (VBID)       | 1.5 years post-VBID (intervention) | Copays:<br>Tier 1: \$0<br>Tier 2: \$8<br>Tier 3: \$25<br>Tier 4: \$45-\$105 | Pre-VBID introduction (comparator)         | Copays:<br>Tier 1: \$8<br>Tier 2: \$25<br>Tier 3: \$35-\$40<br>Tier 4: \$70-\$140 | <b>Significant increase in hospitalizations<sup>a</sup></b><br>ED visits not significantly different | <b>X</b>                          | NR       | Not Sig |
| Roblin 2014 <sup>71</sup> | Initiation or completion of the HPV vaccine series and primary care visits | Traditional HMO plan (comparator)  | <\$5,000 annual deductible                                                  | High-deductible health plan (intervention) | ≥\$5,000 annual deductible                                                        | <b>Significant association with a lower likelihood of having primary care visits among</b>           | NR                                | <b>X</b> | NR      |

| Study                    | HRU Outcome                                                                                     | Lower Cost-Sharing Group                                               | Lower Cost-Sharing | Higher Cost-Sharing Group                                                    | Higher Cost-Sharing                                                                                                   | Result                                                                                                 | HospitalizatOutpatient ED Visits |         |         |
|--------------------------|-------------------------------------------------------------------------------------------------|------------------------------------------------------------------------|--------------------|------------------------------------------------------------------------------|-----------------------------------------------------------------------------------------------------------------------|--------------------------------------------------------------------------------------------------------|----------------------------------|---------|---------|
|                          |                                                                                                 |                                                                        |                    |                                                                              |                                                                                                                       |                                                                                                        | ions                             |         |         |
|                          |                                                                                                 |                                                                        |                    |                                                                              |                                                                                                                       | females aged 9 to 26 years                                                                             |                                  |         |         |
| Phuar 2019 <sup>69</sup> | Hospital, ER, outpatient use oral chemotherapy after initial chronic myeloid leukemia diagnosis | Early initiation of TKIs ( $\leq 1$ month of diagnosis) (intervention) | Mean cost \$190    | Late initiation of TKIs ( $>1$ month to 12 months of diagnosis) (comparator) | Mean cost \$231<br><i>(adjusted analyses found no significant association between mean OOP costs for first 30-day</i> | <b>Significant increase in hospitalizations; no significant differences in ED or outpatient visits</b> | <b>X</b>                         | Not Sig | Not Sig |

| Study                     | HRU Outcome                                   | Lower Cost-Sharing Group           | Lower Cost-Sharing | Higher Cost-Sharing Group             | Higher Cost-Sharing           | Result                                                                                                                 | Hospitalizations | Outpatient | ED Visits |
|---------------------------|-----------------------------------------------|------------------------------------|--------------------|---------------------------------------|-------------------------------|------------------------------------------------------------------------------------------------------------------------|------------------|------------|-----------|
|                           |                                               |                                    |                    |                                       | <i>supply and initiation)</i> |                                                                                                                        |                  |            |           |
| Snider 2016 <sup>78</sup> | Days in hospital among patients with diabetes | Low cost-sharing plan (comparator) | \$10 copay         | High cost-sharing plan (intervention) | \$50 copay                    | Higher copays = <b>significant reductions in adherence; lower adherence = significant increase in hospitalizations</b> | <b>X</b>         | NR         | NR        |

<sup>a</sup> Significant decrease in hospitalizations among the diabetes patients who received the nurse counseling along with reduced copays (these patients were considered high-risk based on risk stratification score); the diabetes patients given health education mailers along

with reduced copays (these patients were considered low-risk based on risk stratification score) had significant increase in hospitalizations.

“X”: Indicates increased cost-sharing was associated with statistically significant increased hospitalization and HRU.

“Not Sig”: A statistically significant association not found between cost-sharing and HRU outcome.

“NR”: association between cost-sharing and specific HRU outcome was not assessed.

Key: ED – emergency department; HRU – healthcare resource utilization; HPV – human papillomavirus; HMO – health maintenance organization; OOP – out-of-pocket; TKI – tyrosine kinase inhibitor; VBID – value-based insurance design.

**Supplemental Table 7. Cost-Sharing and Healthcare Medication Initiation/Uptake**

| <b>First Author and Year</b>   | <b>HRU Outcome</b>                   | <b>Comparat or Group</b> | <b>Comparat or Cost-Sharing</b> | <b>Interventi on Group</b> | <b>Interventi on Cost-Sharing</b> | <b>Result</b>                                                            |
|--------------------------------|--------------------------------------|--------------------------|---------------------------------|----------------------------|-----------------------------------|--------------------------------------------------------------------------|
| Palmer 2012 <sup>65</sup>      | Filling DMT prescription             | High copay               | >\$29                           | Low copay                  | ≤\$29                             | <b>Statisticall y significant decreased odds of filling prescription</b> |
| Gibson 2012 <sup>39</sup>      | Augmentin g therapy for depression   | Copay increase           | \$10                            | No increase                | \$0                               | <b>Statisticall y significant decreased odds of augmentin g therapy</b>  |
| VanderBee k 2020 <sup>99</sup> | Filling initial prescription for DME | Copay                    | ≥\$1                            | No copay                   | \$0                               | <b>Statisticall y significant decreased odds of filling prescription</b> |

| First Author and Year     | HRU Outcome                                     | Comparat or Group      | Comparat or Cost-Sharing             | Interventi on Group   | Interventi on Cost-Sharing | Result                                                                               |
|---------------------------|-------------------------------------------------|------------------------|--------------------------------------|-----------------------|----------------------------|--------------------------------------------------------------------------------------|
|                           |                                                 | HDHP                   | NA                                   | Not HDHP              | NA                         | No significant association                                                           |
| Phuar 2019 <sup>69</sup>  | TKI initiation                                  | Copay                  | >\$0-\$50,<br>>\$50-\$100,<br>>\$100 | No copay              | \$0                        | No significant association                                                           |
| Marcus 2018 <sup>59</sup> | Initiating DAA among HCV patients               | High maximum OOP costs | >\$3,000                             | Low maximum OOP costs | ≤\$3,000                   | <b>Statistically significant decreased RR of filling prescription</b>                |
| Roblin 2014 <sup>71</sup> | Initiation and completion of HPV vaccine series | HDHP                   | ≥\$5,000 annual deductible           | Traditional HMO       | <\$5,000 annual deductible | <b>Among females 9-26: statistically significant decreased odds of initiating or</b> |



| First Author and Year     | HRU Outcome                                                                                  | Comparat or Group          | Comparat or Cost-Sharing | Interventi on Group              | Interventi on Cost-Sharing | Result                                     |
|---------------------------|----------------------------------------------------------------------------------------------|----------------------------|--------------------------|----------------------------------|----------------------------|--------------------------------------------|
|                           |                                                                                              |                            |                          |                                  |                            | <b>completing series</b>                   |
| Law 2016 <sup>54</sup>    | Contraception utilization rates                                                              | Pre-ACA                    |                          | Post-ACA                         | \$0 copay                  | No significant difference                  |
| Pace 2016 <sup>64</sup>   | LARC utilization rates                                                                       |                            |                          |                                  | \$0 copay                  | No significant difference                  |
| Wharam 2019 <sup>85</sup> | Time in receiving a mammogram, having a diagnosis of breast cancer, or starting chemotherapy | Women who remained on LDHP | LDHP (≤\$500)            | Women switched from LDHP to HDHP | HDHP (>\$1,000)            | <b>Significantly longer for HDHP women</b> |

<sup>a</sup> Unclear if “higher” is the result of an analysis that evaluated a \$10 increase in copayment, or if it refers to categorical comparisons across the maximum third-tier fixed copayment amounts (\$25, \$50, \$75, \$100).

<sup>b</sup> among 5-18 year-olds; NS among <5 year-olds.

Key: DMT – disease modifying therapies; HDHP – high-deductible health plan; DAA – direct-acting antiviral agents; HCV – hepatitis C virus; HMO – health maintenance organization; ACA

– Affordable Care Act; LARC – long-acting reversible contraceptives; LDHP – low-deductible health plan; OOP – out-of-pocket.

**Supplemental Table 8. Cost-Sharing and Healthcare Costs**

| Study                           | Cost Outcome                                                                                                                             | Comparator Group                               | Comparator or Cost-Sharing | Intervention Group                          | Intervention Cost-Sharing | Total Healthcare                                       | Medical Care                    | Pharmacy costs                                                                                         |
|---------------------------------|------------------------------------------------------------------------------------------------------------------------------------------|------------------------------------------------|----------------------------|---------------------------------------------|---------------------------|--------------------------------------------------------|---------------------------------|--------------------------------------------------------------------------------------------------------|
| Karaca-Manic 2012 <sup>49</sup> | Total (OOP + plan-paid) asthma-related hospitalization costs; asthma-related hospitalization and medication costs (among 5-18 year olds) | Lowest quartile of OOP asthma medication costs | \$100                      | Highest quartile of asthma medication costs | \$190                     | Not Sig (OOP+plan paid hospitalizations & medications) | Not Sig (Hospitalization costs) | <b>X</b><br>Increased OOP= <b>significantly lower</b> asthma medication expenditures (OOP + plan paid) |

| Study                   | Cost Outcome                | Comparator Group | Comparat or Cost-Sharing | Intervention Group | Interventi on Cost-Sharing | Total Healthcare                                                                                                                                                                                       | Medical Care | Pharmacy costs |
|-------------------------|-----------------------------|------------------|--------------------------|--------------------|----------------------------|--------------------------------------------------------------------------------------------------------------------------------------------------------------------------------------------------------|--------------|----------------|
| Henk 2018 <sup>44</sup> | Mean total healthcare costs | Fixed Copay      |                          | Coinsurance        |                            | <p><b>X</b></p> <p>Fixed = greater adjusted mean total healthcare costs</p> <p>(No sig difference between \$25 vs. \$100 copay increase for OOP+plan paid; higher cost sharing = lower health plan</p> | NR           | NR             |

| Study                                                                              | Cost Outcome           | Comparator Group | Comparat or Cost-Sharing | Intervention Group | Interventi on Cost-Sharing | Total Healthcare                        | Medical Care                                                                                                             | Pharmacy costs                                                                                                                                                             |
|------------------------------------------------------------------------------------|------------------------|------------------|--------------------------|--------------------|----------------------------|-----------------------------------------|--------------------------------------------------------------------------------------------------------------------------|----------------------------------------------------------------------------------------------------------------------------------------------------------------------------|
|                                                                                    |                        |                  |                          |                    |                            | and higher OOP)                         |                                                                                                                          |                                                                                                                                                                            |
| Choudry 2011 <sup>89</sup> ; Choudry 2014 <sup>90</sup> ; Kulik 2013 <sup>92</sup> | Total healthcare costs | Usual copay      |                          | No copay           | \$0                        | Not Sig (Insurer paid or insurer + OOP) | Not Sig<br>No copay = reduction in patient nondrug payments no increase in insurer spending for nondrug medical services | <b>X</b><br>Reduced OOP pharmacy costs and significantly increased insurer-paid pharmacy costs (no significant difference in insurer paid or insurer + OOP pharmacy costs) |

| Study                    | Cost Outcome | Comparator Group    | Comparat or Cost-Sharing | Intervention Group | Interventi on Cost-Sharing | Total Healthcare                                                                                                                                                                       | Medical Care | Pharmacy costs                                                                                                                                                                                                     |
|--------------------------|--------------|---------------------|--------------------------|--------------------|----------------------------|----------------------------------------------------------------------------------------------------------------------------------------------------------------------------------------|--------------|--------------------------------------------------------------------------------------------------------------------------------------------------------------------------------------------------------------------|
| Cheng 2012 <sup>23</sup> |              | Pre-Medicare Part D |                          | Medicare Part D    |                            | Not Sig<br>Total medical <sup>a</sup> OOP significantly reduced; Medicare-paid significantly increased for median (no sig change for 75th, 90th percentile); no significant change for | NR           | <b>X</b><br>3 years following Medicare Part D coverage, significant reductions in OOP prescription costs; Medicare-paid drug expenditures increased; total Medicare-paid + OOP prescription spending significantly |

| Study                     | Cost Outcome                                                                                   | Comparator Group                        | Comparator or Cost-Sharing                                                                      | Intervention Group                              | Intervention on Cost-Sharing | Total Healthcare    | Medical Care | Pharmacy costs                                         |
|---------------------------|------------------------------------------------------------------------------------------------|-----------------------------------------|-------------------------------------------------------------------------------------------------|-------------------------------------------------|------------------------------|---------------------|--------------|--------------------------------------------------------|
|                           |                                                                                                |                                         |                                                                                                 |                                                 |                              | OOP + Medicare-paid |              | increased in 75th and 90th percentile (not for median) |
| Elliot 2013 <sup>32</sup> | total medical costs (assuming this is hospitalizations, ED visits & pharmacy; OOP + plan-paid) | Pre-implementation of copay elimination | Copays: \$10 – generic medications \$25 – preferred brand medications \$50 – nonformulary brand | 1-year post-implementation of copay elimination | \$0 copays                   | NR                  | Not Sig      | Not Sig                                                |

| Study                   | Cost Outcome                                                         | Comparator Group      | Comparator or Cost-Sharing                                                        | Intervention Group  | Intervention on Cost-Sharing                                                | Total Healthcare | Medical Care                                                                                                                     | Pharmacy costs                                    |
|-------------------------|----------------------------------------------------------------------|-----------------------|-----------------------------------------------------------------------------------|---------------------|-----------------------------------------------------------------------------|------------------|----------------------------------------------------------------------------------------------------------------------------------|---------------------------------------------------|
|                         |                                                                      |                       | medications                                                                       |                     |                                                                             |                  |                                                                                                                                  |                                                   |
| Kim 2011a <sup>52</sup> | Medical utilization among employees offered copayment waivers (VBID) | Pre VBID introduction | Copays:<br>Tier 1: \$8<br>Tier 2: \$25<br>Tier 3: \$35-\$40<br>Tier 4: \$70-\$140 | 1.5 years post VBID | Copays:<br>Tier 1: \$0<br>Tier 2: \$8<br>Tier 3: \$25<br>Tier 4: \$45-\$105 | NR               | <b>X</b><br>Reduced copay = lower total medical costs; statistically significantly lower inpatient costs and professional costs; | <b>X</b><br>Reduced copay = higher pharmacy costs |



| Study                     | Cost Outcome                                  | Comparator Group      | Comparat or Cost-Sharing | Intervention Group     | Interventi on Cost-Sharing | Total Healthcare | Medical Care                                                                                                        | Pharmacy costs                                                                                  |
|---------------------------|-----------------------------------------------|-----------------------|--------------------------|------------------------|----------------------------|------------------|---------------------------------------------------------------------------------------------------------------------|-------------------------------------------------------------------------------------------------|
|                           |                                               |                       |                          |                        |                            |                  | Outpatient costs not statistically significantly different                                                          |                                                                                                 |
| Snider 2016 <sup>78</sup> | Days in hospital among patients with diabetes | Low cost-sharing plan | \$10 copay               | High cost-sharing plan | \$50 copay                 | NR               | <b>X</b><br>\$342 per person increase in payer hospitalization costs. higher overall payer costs (combined drug and | <b>X</b><br>High cost-sharing = \$242 reduction in per-person payer costs for T2D prescriptions |

| Study                        | Cost Outcome   | Comparator Group                            | Comparator or Cost-Sharing | Intervention Group | Intervention on Cost-Sharing | Total Healthcare | Medical Care           | Pharmacy costs                                               |
|------------------------------|----------------|---------------------------------------------|----------------------------|--------------------|------------------------------|------------------|------------------------|--------------------------------------------------------------|
|                              |                |                                             |                            |                    |                              |                  | hospitalization costs) |                                                              |
| Daubresse 2017 <sup>29</sup> | Pharmacy costs | No Coupon                                   |                            | Coupon             |                              | NR               | NR                     | Not Sig<br>OOP + plan paid                                   |
| Clark 2014 <sup>25</sup>     | Pharmacy costs | to propensity matched non-VBID participants | Usual copay                | No copay (VBID)    | \$0                          | NR               | NR                     | <b>X</b><br>Savings to employers of \$24 per member per year |

KEY: NR – not reported; T2D – type 2 diabetes; VBID – value based insurance design
